# Supplementary material
Source: HighWire-hosted journal article supplement (https://ard.bmj.com/content/ard-2022-222486)
Supplement: inline-supplementary-material-1 [file inline-supplementary-material-1.pdf]

1  
2  
3  
4  
5  
6  
7  
8  
9  
10  
11  
12  
13  
14  
15  
16  
17  
18  
19  
20  
21  
22  
23  
24  
25  
26  
27  
28  
29

## SUPPLEMENTARY METHODS FOR

### **Leflunomide Versus Azathioprine for Maintenance Therapy of Lupus Nephritis: A Prospective, Multicenter, Randomized Trial and Long-term Follow-up**

Qiong Fu, <sup>1†</sup> Chunmei Wu, <sup>1†</sup> Min Dai, <sup>1†</sup> Suli Wang, <sup>1</sup> Jianhua Xu, <sup>2</sup> Lie Dai, <sup>3</sup> Zhijun Li, <sup>4</sup> Lan He, <sup>5</sup> Xiaochun Zhu, <sup>6</sup> Lingyun Sun, <sup>7</sup> Liangjing Lu, <sup>1\*</sup> Chunde Bao <sup>1\*</sup>

#### **Content**

|                                                                                    |    |
|------------------------------------------------------------------------------------|----|
| 1. Primary Objectives.....                                                         | 2  |
| 2. Study Design.....                                                               | 2  |
| 3. Sample Size .....                                                               | 3  |
| 4. Study Period and Follow-up Timing.....                                          | 3  |
| 5. Medication and Usage.....                                                       | 4  |
| 6. Concomitant Medication .....                                                    | 4  |
| 7. Inclusion/Exclusion Criteria; Discontinuation and Withdrawal of the Study ..... | 5  |
| 8. Observation Items .....                                                         | 7  |
| 9. Efficacy Evaluation Criteria .....                                              | 7  |
| 10. Randomization and masking.....                                                 | 9  |
| 11. Endpoints and Statistical Indicators .....                                     | 9  |
| 12. Adverse Events .....                                                           | 10 |
| 13. Protocol Flow Chart .....                                                      | 11 |
| 14. Data Collection and Management.....                                            | 12 |
| 15. Data and Analysis .....                                                        | 13 |
| 16. Study approval .....                                                           | 13 |
| 17. Patient and public involvement.....                                            | 13 |

## 30 **1. Primary Objectives**

31 To compare the efficacy and safety of leflunomide (LEF) and azathioprine (AZA) in long-term  
32 maintenance therapy for subjects with lupus nephritis (LN).

33

## 34 **2. Study Design**

35 This is a randomized, open, parallel-controlled, multicenter clinical study.

36 **a. Induction therapy period:** Subjects with active LN will be treated with the NIH regimen  
37 (cyclophosphamide (CYC) + Pred) for 6–9 months.

38 CYC: Intravenous infusion, 0.5–1 g/m<sup>2</sup> body surface area, once a month, a total of seven times;

39 Prednisone: Oral. During the 1<sup>st</sup> month, 1 mg/kg/d; starting at the 2<sup>nd</sup> month, reduce by 5 mg every 2  
40 weeks; after reducing to 30 mg/d, lower the amount of reduction to 2.5 mg every 2 weeks; at the end of

41 6 months, the prednisone dose should not exceed 10 mg/d (regarding the specific method of hormone

42 reduction during the induction period, the attending physician can adjust the dose according to the

43 subject's specific urine protein and kidney function level). If necessary, induction therapy would be

44 extended to 9 months for those who showed inadequate clinical response after 6 months of treatment.

45 **b. Maintenance therapy period:** After remission induction therapy, subjects who achieved partial

46 response (PR) or complete response (CR) will be randomized to one of two treatment arms in a 1:1 ratio

47 with different maintenance of remission treatment regimens (AZA + Pred referred to as the AZA group

48 or LEF + Pred referred to as the LEF group) by the central random principle (network random system

49 program). After 6 months of remission induction therapy, if subjects do not achieve CR or PR, they can

50 continue the original treatment regimen for an additional 3 months. If CR or PR is achieved after the

51 additional 3 months, subjects will be randomized to either of the two groups (1:1, AZA group and LEF

52 group). If remission is still not achieved after a total of 9 months of induction therapy, the patients will

53 not be enrolled in this study. The maintenance of remission period is 36 months.

### 54 **c. Treatment regimens:**

55 1) AZA group: azathioprine, oral, 1.5-2 mg/kg/d (maximum dose is 100 mg/d), initial dose is 50 mg/d (if

56 no abnormality is detected by weekly blood tests, then increase to 100 mg/d at the 2<sup>nd</sup> month and maintain

57 the dose until the end of the study if no adverse events occur. If any adverse event occurs, the dose will

58 be reduced as appropriate until the end of the study).

59 2) LEF group: leflunomide, oral, 20 mg/d.

60 During the maintenance period, immunosuppressants can be combined with glucocorticoids in both  
 61 groups, but the prednisone dose should not exceed 10 mg/d. During the 9<sup>th</sup>–12<sup>th</sup> month of the maintenance  
 62 period, the glucocorticoid will be gradually reduced to (equivalent to prednisone) 7.5 mg/d, and during  
 63 the 12<sup>th</sup>–15<sup>th</sup> month of the maintenance period, the dosage equivalent to prednisone will be 5–7.5 mg/d  
 64 until the end of the experiment.

65 During the follow-up period, if severe extrarenal symptoms occur, the glucocorticoid dose can be  
 66 increased (equivalent to prednisone, 1 mg/kg/d) for no more than 2 weeks and gradually reduced  
 67 thereafter.

68

### 69 3. Sample Size

70 This study was designed as a non-inferiority trial. The non-inferiority margin was set at 12% for the  
 71 primary outcome (flare at 36 months), meaning that the lower bound of the two-sided 95% confidence  
 72 interval for the difference in flare rates between the LEF and AZA groups (as reference) should exceed  
 73 –12%. A previous study in patients with SLE reported flare rates of 15% in the LEF arm and 20% in the  
 74 AZA arm. Assuming that the flare rates in LEF and AZA groups at 36 months will differ by 5%, a sample  
 75 size of 158 patients was needed to yield a power of 80% and establish the non-inferiority of LEF to AZA,  
 76 with a one-sided  $\alpha$  level of 0.025. The sample size calculation made the conservative assumption that the  
 77 dropout rate would be as high as 20%. Therefore, the required sample size is 200.

78

#### Non-Inferiority Tests for the Difference Between Two Proportions

##### Numeric Results for Non-Inferiority Tests for the Difference Between Two Proportions

Test Statistic: Z-Test with Unpooled Variance

H0:  $P1 - P2 \geq D0$  vs. H1:  $P1 - P2 = D1 < D0$ .

| Target Power | Actual Power* | N1  | N2  | N   | Ref. P2 | P1 H0 P1.0 | P1 H1 P1.1 | NI Diff D0 | Diff D1 | Alpha |
|--------------|---------------|-----|-----|-----|---------|------------|------------|------------|---------|-------|
| 0.80         | 0.80276       | 101 | 101 | 202 | 0.2000  | 0.3000     | 0.1500     | 0.1000     | -0.0500 | 0.025 |
| 0.80         | 0.80457       | 79  | 79  | 158 | 0.2000  | 0.3200     | 0.1500     | 0.1200     | -0.0500 | 0.025 |
| 0.80         | 0.80404       | 57  | 57  | 114 | 0.2000  | 0.3500     | 0.1500     | 0.1500     | -0.0500 | 0.025 |

\* Power was computed using the normal approximation method.

79

80

### 81 4. Study Period and Follow-up Timing

82 The study period is 42–45 months.

#### 83 Follow-up time:

84 **a. Induction period:** Follow-up will be performed at the screening day, enrollment day, 2<sup>nd</sup> week after  
85 enrollment, and 1<sup>st</sup>, 2<sup>nd</sup>, 3<sup>rd</sup>, and 6<sup>th</sup> month after enrollment (after 6 months of remission induction therapy,  
86 if subjects do not achieve CR or PR, they will continue the original regimen, and follow-up will be  
87 performed at the 9<sup>th</sup> month). After the start of treatment, periodic disease assessment and curative effect  
88 evaluation will be carried out every 3 months.

89 **b. Maintenance period:** During the 1<sup>st</sup> month of the maintenance period, follow-up will be performed  
90 every 2 weeks. From the 2<sup>nd</sup> to 4<sup>th</sup> month of the maintenance period, the follow-up frequency will be  
91 reduced to once a month and then continuously reduced to every 2 months. During the first 12 months  
92 of treatment, the periodic condition assessment and curative effect evaluation will be carried out every 2  
93 months, followed by every 4 months until the end of the study.

94

## 95 **5. Medication and Usage**

### 96 **Test drug:**

- 97 a. Leflunomide Tablets (10 mg/tablet, Suzhou Changzheng-Cinkate Pharmaceutical Co., Ltd.)  
98 b. Cyclophosphamide Powder for the Injection Solution (0.2 g/vial, no restrictions on manufacturers)  
99 c. Azathioprine Tablets (50 mg/d, Sine Pharmaceutical General Factory, which belongs to Shanghai  
100 Pharmaceutical (Group) Co., Ltd.)  
101 d. Prednisone Tablets (5 mg/tablet, Sine Pharmaceutical General Factory, which belongs to Shanghai  
102 Pharmaceutical (Group) Co., Ltd.)

103

## 104 **6. Concomitant Medication**

105 Antihypertensive drugs, such as  $\beta$  receptor blockers and calcium channel blockers, should be used  
106 appropriately (the target systolic blood pressure is below 140 mmHg). Angiotensin-converting-enzyme  
107 inhibitors and angiotensin II receptor blockers can be added as second-line antihypertensive drugs for  
108 patients who newly developed hypertension during the follow-up. If they have been used by subjects  
109 before enrollment, the original regimen can be sustained in principle.

110 The use of drugs to treat other diseases is permitted and must be recorded.

111 Both groups can use hydroxychloroquine (maximum dose  $\leq$ 400 mg/d).

112 Immunosuppressants other than CYC, leflunomide, and AZA are not allowed in either group.

113

114 **7. Inclusion/Exclusion Criteria; Discontinuation and Withdrawal of the Study**

115 **a. Inclusion criteria:**

- 116 1) Aged 18–65 years;
- 117 2) A clinical diagnosis of systemic lupus erythematosus (SLE) according to the 1982 SLE diagnostic  
118 criteria of the American College of Rheumatology;
- 119 3) Systemic lupus erythematosus disease activity index (SLEDAI) score  $\geq 8$ ;
- 120 4) Within 90 days of baseline (Day 0), have a biopsy-proven diagnosis of active LN, with a pathological  
121 classification of class III or IV active or active/chronic LN (concomitant class V is permitted) and class  
122 V LN (International Society of Nephrology/Renal Pathology Society 2003);
- 123 5) Continuous proteinuria ( $\geq 1$  g/24 h) with or without microscopic hematuria;
- 124 6) Signed the informed consent forms.

125

126 **b. Exclusion criteria:**

- 127 1) Known to be allergic to LEF, CYC, and AZA;
- 128 2) Subjects who have used cytotoxic drugs, such as CYC, within 90 days of baseline (Day 0) or received  
129 more than 200 mg methylprednisolone pulse therapy within 6 weeks of baseline (Day 0);
- 130 3) Weight  $< 45$  kg;
- 131 4) Serious infection and other fatal complications;
- 132 5) Severe lupus activity, such as neuropsychiatric systemic lupus erythematosus;
- 133 6) Extensive crescentic nephritis ( $> 50\%$ ) with significantly abnormal kidney function;
- 134 7) A history of active gastric ulcer or active inflammatory gastrointestinal disease within 6 months of  
135 baseline (Day 0);
- 136 8) Subjects with obvious blood system diseases and abnormal laboratory examination (white blood cell  
137 (WBC) count  $< 3 \times 10^9/L$  or platelet (PLT) count  $< 50 \times 10^9/L$ , except that caused by SLE);
- 138 9) Moderate to severe anemia;
- 139 10) A history of chronic hepatitis;
- 140 11) Active tuberculosis;
- 141 12) Abnormal liver function (alanine transaminase (ALT) or aspartate aminotransferase (AST)  $> 2$  times  
142 higher than the upper limit of normal, except that caused by SLE);
- 143 13) Abnormal kidney function with estimated glomerular filtration rate  $< 30$  mL/min/1.73 m<sup>2</sup>;

- 144 14) A history of alcoholism within 2 years;
- 145 15) A history of a malignant tumor, except skin and cervical intraepithelial neoplasia;
- 146 16) Decompensated cardiac insufficiency or severe hypertension;
- 147 17) Psychiatric subjects;
- 148 18) Epilepsy and other disorders of the nervous system;
- 149 19) Pregnant women, lactating women, or subjects who are unwilling to take effective contraception
- 150 measures;
- 151 20) Other connective tissue diseases;
- 152 21) Subjects who need >1 mg/kg/d prednisone to control extrarenal lesions;
- 153 22) Patients with poor drug compliance.

154

155 **c. Discontinuation of the study:**

- 156 1) Occurrence of serious adverse events (WBC count <2000/mm<sup>3</sup> or PLT count <50000/mm<sup>3</sup>);
- 157 2) Occurrence of severe gastrointestinal adverse events, subjects who cannot tolerate the agent despite
- 158 adjusting the treatment (such as reducing the drug dose);
- 159 3) Progressive decline in kidney function: SCr doubling or progressing to kidney failure;
- 160 4) Occurrence of fatal complications, such as lupus encephalopathy or severe infection;
- 161 5) Pregnancy;
- 162 6) Unwilling to continue treatment or poor drug compliance;
- 163 7) During the induction period, the subjects' disease progresses, requiring high-dose glucocorticoid
- 164 treatment (equivalent to a prednisone dose >1 mg/kg/d for more than 2 weeks) or other
- 165 immunosuppressants to control the disease or remains no response after 9 months of treatment;
- 166 8) During the maintenance of remission period, one of the following occur:
- 167 i. Recurrent LN requiring high-dose glucocorticoid therapy (>30 mg/d);
- 168 ii. Recurrence of extrarenal symptoms requiring the use of high-dose glucocorticoid (equivalent to a
- 169 prednisone dose >1 mg/kg/d for more than 2 weeks) or other immunosuppressants to control the disease;
- 170 iii. Subjects with LN who experience proteinuria flare and/or moderate to severe kidney flare.

171

172 **d. Withdrawal:**

173 Subjects can withdraw from the trial at any time. The investigator may also discontinue the treatment of  
174 subjects for a variety of reasons (see trial discontinuation criteria), including adverse events, safety  
175 considerations, poor or no efficacy, or the subjects' inability to comply with the protocol.

176

## 177 **8. Observation Items**

178 **a. Clinical indicators:** General condition (such as weight, blood pressure, heart rate, and pulse) and  
179 disease-related characteristic clinical manifestations and signs. For women, menstruation will also be  
180 observed. For each follow-up, the above data will be recorded.

### 181 **b. Lab test:**

182 1) Routine blood tests, WBC, hemoglobin, and PLT examined at each follow-up;

183 2) Routine urine + urinary sediment microscopy examined at each follow-up;

184 3) 24-h urine protein quantity examined during the induction period (once at baseline and once a month  
185 within the first 3 months, followed by once every 3 months) and the maintenance period (once a month  
186 during the first four months, followed by once every 2 months);

187 4) Liver function: At least including ALT, AST, albumin, and total bilirubin examined at each follow-up;

188 5) Kidney function: At least including SCr, blood urea nitrogen, and eGFR examined during the induction  
189 period (once at baseline and once a month during the first 3 months, followed by every 3 months) and  
190 the maintenance period (once a month during the first 4 months, followed by every 2–4 months);

191 6) Immunological examination: At least including antinuclear antibodies (ANA) and anti-ds-DNA  
192 examined during the induction period (once at baseline and once at the 3<sup>rd</sup>, 6<sup>th</sup>, and 9<sup>th</sup> month) and the  
193 maintenance period (once every 2 months during the first 12 months and every 4 months thereafter);

194 7) Complement: At least including C3 and C4 examined during the induction period (once at baseline  
195 and one time at the 3<sup>rd</sup>, 6<sup>th</sup>, and 9<sup>th</sup> month) and the first 12 months of the maintenance period (examined  
196 once every 2 months and every 4 months thereafter);

197 8) Erythrocyte sedimentation rate examined during the induction period (once at baseline, once a month  
198 during the first 3 months, and once every 3 months thereafter) and the maintenance period (once a month  
199 during the first 6 months, followed by once every 2 months);

200 9) Electrocardiogram: once before treatment.

201

## 202 **9. Efficacy Evaluation Criteria**

203 **a. Induction therapy:**

204 1) Complete response (CR, all the following conditions should be met simultaneously):

205 i. 24-h urine protein quantity <0.5 g;

206 ii. Inactive urinary sediment (RBC <5/high-power field (HPF), WBC <5/HPF);

207 iii. Serum albumin  $\geq 35$  g/L;

208 iv. Improved or stabilized kidney function (SCr change is within  $\pm 25\%$  of baseline value).

209

210 2) Partial response (PR, all the following conditions should be met simultaneously):

211 i. Significant improvement in 24-h urine protein (at least a 50% decrease in the 24-h urine protein to <3

212 g/24 h if the baseline urine protein is >3.5 g/24 h, or to  $\leq 1$  g/24 h if the baseline urine protein does not

213 reach the level of nephrotic syndrome);

214 ii. Serum albumin  $\geq 30$  g/L;

215 iii. Stable or improved kidney function (SCr change within  $\pm 25\%$  of baseline value).

216

217 3) No response (subjects are eligible if they meet any one of the following criteria):

218 i. Continuous urine protein, 24-h urine protein quantity  $\geq 3$  g or decreased by <50% compared with

219 baseline;

220 ii. Progressive impairment of kidney function (compared with baseline, SCr increased >50  $\mu\text{mol/L}$  or a

221 decrease in the creatinine clearance rate by >15%);

222 iii. Early discontinuation or withdrawal from the trial due to adverse drug events.

223

224 **b. Maintenance of remission in subjects who achieved CR or PR**

225 1) Kidney flares:

226 (i) the recurrence or development of nephrotic syndrome (24-h proteinuria  $\geq 3.5$  g and serum albumin

227 <30 g/L), (ii) abnormal kidney function (>30% increase in SCr within a 1-month period directly

228 attributed to lupus and confirmed 2 weeks later, or (iii) 2-fold increase in proteinuria (24-h proteinuria >1

229 g in patients with proteinuria <0.5 g/24 h (CR) at the end of induction or doubling of the proteinuria in

230 patients with PR at the end of induction). A kidney flare may occur with or without new or increased

231 hematuria ( $\geq 5$  RBC/HPF) or the appearance of cellular casts.

232



233 2) Extrarenal flares  
234 Disease activity of extrarenal organs or systematic disease activity occurs with a SLEDAI score  $\geq 10$ .  
235 Note: Flares must be re-checked 2 weeks after the initial examination to validate the diagnosis.

236

## 237 **10. Randomization and masking**

238 Patients fulfilling the inclusion/exclusion criteria were allocated to LEF or AZA group by randomization.  
239 Randomization was performed using a computerized, interactive voice-response system with  
240 stratification according to center, age, gender, and kidney biopsy classification. This is an open label  
241 study without masking.

242

## 243 **11. Endpoints and Statistical Indicators**

### 244 **a. Endpoints:**

245 1) Primary efficacy endpoint: time to kidney flare.  
246 2) Secondary efficacy endpoint: the number of patients achieving complete kidney response (proteinuria  
247  $< 500$  mg per 24 h, absence of hematuria and cellular casts, and improved or stable SCr within  $\pm 25\%$  of  
248 baseline); kidney -associated variables, including 24-h proteinuria, SCr, and serum albumin over time;  
249 frequency of extrarenal flares; immunologic variables (C3, C4, and anti-double-stranded DNA  
250 antibodies); and safety profile.

### 251 **b. Statistical indicators:**

252 1) Main indicators: kidney flare time and kidney flare-up rate.  
253 2) Other indicators:  
254 i. Extrarenal flare rate and extrarenal flare-up time  
255 ii. Incidence rate of SCr doubling  
256 iii. Incidence rate and timing of the composite endpoint (kidney failure or death)  
257 iv. Incidence rate of adverse events and serious adverse events  
258 v. Rate of withdrawal in maintenance phase  
259 vi. SCr  
260 vii. 24-h urine protein  
261 viii. Serum albumin  
262 ix. ANA positive rate or titer

263 x. Positive rate or titer of anti-dsDNA

264 xi. Complement C3, C4

265 xii. SLEDAI

266

## 267 **12. Adverse Events**

268 For all observed or spontaneously reported adverse events, adverse event reports should be filled in and  
269 submitted, and the correlation between the adverse event and the drug should also be determined.

270 **a. Definition of adverse events:** Adverse medical events in subjects during clinical trials that are not  
271 necessarily causally related to drug use or treatment.

272 **b. Adverse events include, but are not limited to:**

273 1) Abnormal laboratory findings;

274 2) Symptoms and signs with clinical significance;

275 3) Overdose;

276 4) Drug withdrawal;

277 5) Drug abuse;

278 6) Drug misuse;

279 7) Drug dependence;

280 8) Pregnancy events.

281 **c. A serious adverse event refers to any adverse medical events occurring at any dose that includes  
282 any of the following conditions:**

283 1) Resulting in death;

284 2) Life-threatening;

285 3) Require hospitalization or the original length of hospitalization extended;

286 4) Cause permanent or severe disability/incapacity to work;

287 5) Resulting in congenital deformity/birth defects.

288 **d. Evaluation of adverse events:**

289 The correlation between adverse events and medication will be judged according to the following 5  
290 grades: positive, probable, probable, unknown, and irrelevant. The first three grades are classified into  
291 adverse reactions.

292 The degree of adverse reaction is divided into three grades:

293 Grade 1(+): Mild: subjects recover within a short time without treatment, and subjects take medication  
294 as usual;

295 Grade 2(++): Moderate: Symptoms are more obvious, and subjects can continue the drug after temporary  
296 drug withdrawal or treatment;

297 Grade 3(+++): Reaction is severe, and subjects must discontinue the drug.

298

299 **e. Principles for the management of major adverse events:**

300 1) Abnormal hemogram and liver function:

|                | The original plan continuation                      | Dosage reduction                                    | Drug withdrawal                      |
|----------------|-----------------------------------------------------|-----------------------------------------------------|--------------------------------------|
| Hemogram       | WBC (white blood cell) count $\geq 3 \times 10^9/L$ | WBC count $< 3 \times 10^9/L$                       | WBC count $< 2 \times 10^9/L$        |
| Liver function | Transaminase increased $< 1.5$ times                | 1.5 times $\leq$ transaminase elevation $< 3$ times | Elevated transaminase $\geq 3$ times |

301

302 In the above cases, hepatoprotective drugs and WBC-elevating drugs can be added as appropriate. The  
303 investigator will adjust the regimen according to the correlation between the adverse events and the drug.

304 If reexamination shows that liver function is normal, the original treatment dose can be restored. The  
305 above treatment can be repeated three times. If the liver function is abnormal for the 4<sup>th</sup> time after dosage  
306 reduction/drug withdrawal, the dosage should not be increased/restored.

307 2) Drug allergy: withdraw from the study and be treated based on clinical experience.

308 3) Other adverse events: be treated according to clinical diagnosis and treatment routine. For subjects  
309 with serious adverse events, they may withdraw from the study at the discretion of attending physicians.

310

311 **13. Protocol Flow Chart**

312 Protocol flow chart (without considering the adjusted contents of the Protocol):

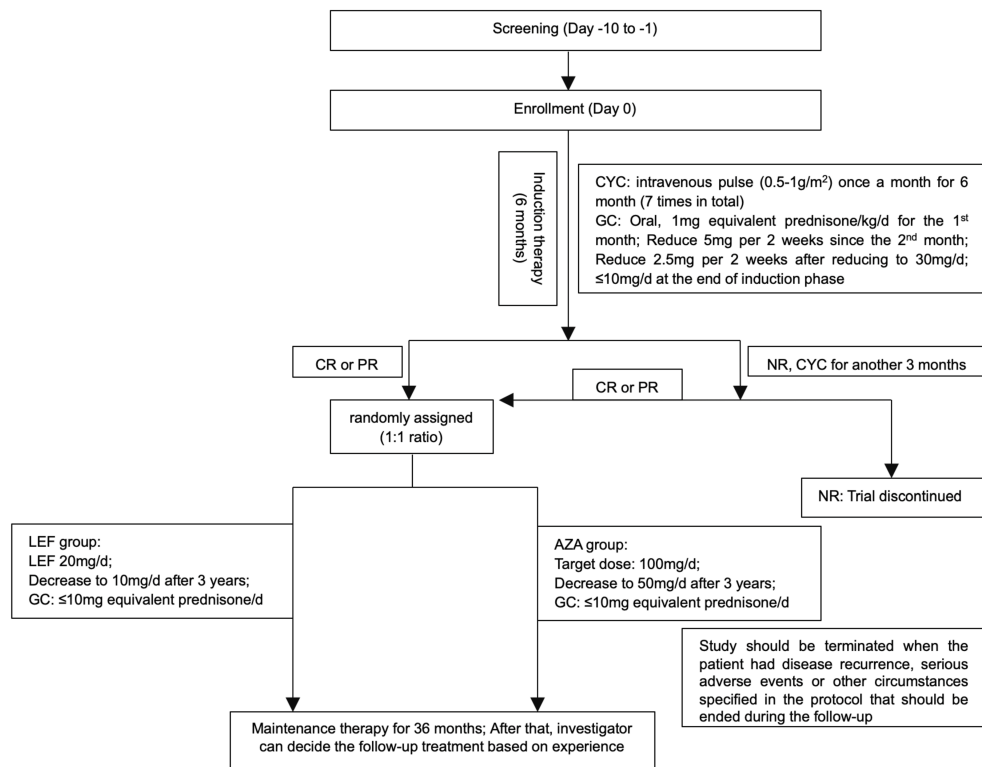

313

314

#### 315 14. Data Collection and Management

316 The researcher is responsible for maintaining accurate, complete, and up-to-date records for each subject.

317 The researcher is also responsible for maintaining any source files related to the research, including any  
318 photos, movies, tracings, computer CDs, or tapes.

319 Documents that identify subjects beyond the subject number will not be submitted to the sponsor (for  
320 example, signed informed consent documents or initials of the subject's name) and must be kept strictly  
321 confidential by the investigator (unless it is necessary to allow regulatory agencies to conduct audit  
322 scopes), research supervisor, or sponsor representative. On-site personnel will use the electronic data  
323 collection (EDC) system provided and approved by the sponsor to record all data of each research subject  
324 through the electronic case report form (eCRF). The research center must complete the eCRF in time,  
325 and the researcher must check the completed eCRF in time after each visit for each subject.

326 The EDC system automatically generates queries through computer checks embedded in the system to  
327 ensure the accuracy, quality, consistency, and completeness of the database. Manual queries generated  
328 by the review by monitors, medical coders, and other data management personnel are also generated and  
329 tracked within the EDC system. The site will resolve the query and correct the entered data when

12

330 necessary. Every change to the data is captured in the EDC system audit trail. After the research is  
331 completed, or after reaching the pre-designated point in the research, the data management will lock the  
332 database and generate the dataset required for data analysis and reporting.

333

### 334 **15. Data and Analysis**

335 Descriptive analysis is performed for the general characteristics of patients. Continuous variables with a  
336 normal distribution and non-normal distribution are expressed as the mean  $\pm$  standard deviation (mean  $\pm$   
337 SD) and median and interquartile range (median, IQR), respectively. The grade data are compared by  
338 Ridit analysis, and the adverse event (AE) rate and count data are compared by the chi-square test or  
339 Fisher's exact test. The measurement data are compared by Student's t-test. Time to flare, the remission  
340 time, kidney survival time, and survival time of subjects between the two groups are analyzed by survival  
341 analysis. The survival curve is analyzed by the Kaplan–Meier method.

342

### 343 **16. Study approval**

344 This study was approved by Shanghai Renji Hospital Ethics Committee (No. 2010-8) and all participants  
345 provided written informed consent. The study was conducted in accordance with the principles expressed  
346 in the Declaration of Helsinki.

347

### 348 **17. Patient and public involvement**

349 At what stage in the research process were patients/the public first involved in the research and how?

350 A: Lupus nephritis patients were involved in this research from the beginning of the study. After 6–9  
351 months of the intravenous cyclophosphamide regimen combined with glucocorticoids, patients achieved  
352 complete or partial response (CR or PR) were randomly assigned to the leflunomide group or  
353 azathioprine group for a 36-month maintenance therapy.

354

355 How were the research question(s) and outcome measures developed and informed by their priorities,  
356 experience, and preferences?

357 A: Patients were involved in the original research and actively contributed to identifying the issue of  
358 inconsistent reporting, the need for guidance, and the research question.

359

360 How were patients/the public involved in the design of this study?

361 A: Patients/the public were not involved in the design of this study.

362

363 How were they involved in the recruitment to and conduct of the study?

364 A: Patients were involved in the conduct of the study by regular follow-up visits and completion of

365 clinical examination and laboratory tests.
